# Supplementary material for: 24-epibrassinosteroid and jasmine oil improve vegetative growth and productivity of Flame Seedless grapevines under abiotic stresses
Source: PeerJ. 2025 Oct 14;13:e20181. doi: 10.7717/peerj.20181 (PMC12533540; doi:10.7717/peerj.20181)
Supplement: Supplemental Information 1 [file peerj-13-20181-s001.xlsx]

## Sheet: data of charts
Flame Seedless
	Shoot length (cm)
Treatments	Control	Br (1 mg/L)	Br (2 mg/L)	Br (3 mg/L)	JO (500 µL/L)	JO (1000 µL/L)	JO (1500 µL/L)
Season 2023	149.667	167.667	175.667	184.333	157	162.333	162.667
Season 2024	157.667	175.667	178.333	192.333	162.333	170.333	172
	Leaf surface area (cm2)
Treatments	Control	Br (1 mg/L)	Br (2 mg/L)	Br (3 mg/L)	JO (500 µL/L)	JO (1000 µL/L)	JO (1500 µL/L)
Season 2023	126.667	150	154.667	161	135.333	140	142.333
Season 2024	128.047	151.635	156.353	162.755	136.808	141.526	143.885
	chlorphy a
Treatments	Control	Br (1 mg/L)	Br (2 mg/L)	Br (3 mg/L)	JO (500 µL/L)	JO (1000 µL/L)	JO (1500 µL/L)
Season 2023	4.901	6.084	6.26383	6.51667	5.1805	5.46867	5.77417
Season 2024	5.3625	6.34617	6.48267	6.66033	5.45197	5.58207	5.69573
	chlorphy b
Treatments	Control	Br (1 mg/L)	Br (2 mg/L)	Br (3 mg/L)	JO (500 µL/L)	JO (1000 µL/L)	JO (1500 µL/L)
Season 2023	2.639	3.276	3.37283	3.58167	2.7895	2.94467	3.10917
Season 2024	2.8875	3.41717	3.49067	3.58633	3.20137	3.42127	3.49093
	Total chlorophyll content (mg/g fw)
Treatments	Control	Br (1 mg/L)	Br (2 mg/L)	Br (3 mg/L)	JO (500 µL/L)	JO (1000 µL/L)	JO (1500 µL/L)
Season 2023	7.54	9.36	9.63667	10.2333	7.97	8.41333	8.88333
Season 2024	8.25	9.76333	9.97333	10.2467	8.65333	9.00333	9.18667
	Leaf content of N (%)
Treatments	Control	Br (1 mg/L)	Br (2 mg/L)	Br (3 mg/L)	JO (500 µL/L)	JO (1000 µL/L)	JO (1500 µL/L)
Season 2023	1.41	2.19	2.27667	2.42667	1.54333	1.87	2.07
Season 2024	1.47	2.15	2.27667	2.41667	1.59	1.74667	1.93667
	Leaf content of P (%)
Treatments	Control	Br (1 mg/L)	Br (2 mg/L)	Br (3 mg/L)	JO (500 µL/L)	JO (1000 µL/L)	JO (1500 µL/L)
Season 2023	0.156667	0.27	0.283333	0.336667	0.183333	0.206667	0.246667
Season 2024	0.176667	0.273333	0.28	0.313333	0.186667	0.21	0.233333
	Leaf content of K (%)
Treatments	Control	Br (1 mg/L)	Br (2 mg/L)	Br (3 mg/L)	JO (500 µL/L)	JO (1000 µL/L)	JO (1500 µL/L)
Season 2023	1.26	1.44	1.53	1.55	1.33333	1.44	1.55333
Season 2024	1.21333	1.52	1.58	1.65333	1.25333	1.35333	1.48667
	Fe (ppm)
Treatments	Control	Br (1 mg/L)	Br (2 mg/L)	Br (3 mg/L)	JO (500 µL/L)	JO (1000 µL/L)	JO (1500 µL/L)
Season 2023	78.3333	135	141.667	168.333	91.6667	103.333	123.333
Season 2024	87.3333	134.667	138	154.667	90.6667	104.333	114
	Zinc (ppm)
Treatments	Control	Br (1 mg/L)	Br (2 mg/L)	Br (3 mg/L)	JO (500 µL/L)	JO (1000 µL/L)	JO (1500 µL/L)
Season 2023	34.3333	59	62	73.6667	40	45	53.6667
Season 2024	40.3333	62.3333	64	71.6667	42.6667	48	53.3333
	Mn (ppm)
Treatments	Control	Br (1 mg/L)	Br (2 mg/L)	Br (3 mg/L)	JO (500 µL/L)	JO (1000 µL/L)	JO (1500 µL/L)
Season 2023	110.333	126	134	136	116.667	126.333	136.667
Season 2024	114.667	144	150	156.333	119	129	140.667
	Mg content (ppm)
Treatments	Control	Br (1 mg/L)	Br (2 mg/L)	Br (3 mg/L)	JO (500 µL/L)	JO (1000 µL/L)	JO (1500 µL/L)
Season 2023	130.333	150.667	160.333	163	139.333	151.333	163.667
Season 2024	132.333	172.667	179.667	187	142.333	154.333	165
	Leaf Ca (%)
Treatments	Control	Br (1 mg/L)	Br (2 mg/L)	Br (3 mg/L)	JO (500 µL/L)	JO (1000 µL/L)	JO (1500 µL/L)
Season 2023	1.01667	1.24667	1.31	1.33	1.13667	1.23333	1.33667
Season 2024	1.09333	1.41	1.47	1.55	1.14	1.26	1.36667
	Internode length (cm)
Treatments	Control	Br (1 mg/L)	Br (2 mg/L)	Br (3 mg/L)	JO (500 µL/L)	JO (1000 µL/L)	JO (1500 µL/L)
Season 2023	7.57333	8.43667	8.88667	9.18667	7.96667	8.17333	8.27667
Season 2024	8.14333	8.9	9.18667	9.8	8.51	8.80667	8.90667
	Coefficient wood ripening
Treatments	Control	Br (1 mg/L)	Br (2 mg/L)	Br (3 mg/L)	JO (500 µL/L)	JO (1000 µL/L)	JO (1500 µL/L)
Season 2023	0.736667	0.86	0.886667	0.903333	0.79	0.813333	0.823333
Season 2024	0.74	0.873333	0.873333	0.9	0.826667	0.84	0.85
	Total carbohydrates
Treatments	Control	Br (1 mg/L)	Br (2 mg/L)	Br (3 mg/L)	JO (500 µL/L)	JO (1000 µL/L)	JO (1500 µL/L)
Season 2023	18.8467	21.9333	22.7233	24.5233	20.24	21.2533	21.85
Season 2024	20.3767	22.2	23.6933	25.1333	20.98	21.98	22.18
	Number of leaves per shoot
Treatments	Control	Br (1 mg/L)	Br (2 mg/L)	Br (3 mg/L)	JO (500 µL/L)	JO (1000 µL/L)	JO (1500 µL/L)
Season 2023	19.9	22.3667	23.4667	24.5433	20.9	21.6	21.6333
Season 2024	20.9667	23.4	23.82	25.62	21.8	22.6333	23.1
	Yield/vine (kg)
Treatments	Control	Br (1 mg/L)	Br (2 mg/L)	Br (3 mg/L)	JO (500 µL/L)	JO (1000 µL/L)	JO (1500 µL/L)
Season 2023	14.08	16.24	16.98	17.94	14.86	15.16	15.63
Season 2024	13.55	15.95	16.81	17.91	14.21	14.67	15.29
	Cluster weight (g)
Treatments	Control	Br (1 mg/L)	Br (2 mg/L)	Br (3 mg/L)	JO (500 µL/L)	JO (1000 µL/L)	JO (1500 µL/L)
Season 2023	469.333	541.333	566	598	495.333	505.333	521
Season 2024	451.667	531.667	560.333	597	473.667	489	509.667
	Cluster length (cm)
Treatments	Control	Br (1 mg/L)	Br (2 mg/L)	Br (3 mg/L)	JO (500 µL/L)	JO (1000 µL/L)	JO (1500 µL/L)
Season 2023	21	24.3333	25.6667	27.6667	21.3667	22.3667	23
Season 2024	20.5667	24.5333	25.8333	27.5333	21.8333	22.5333	23.5
	cluster width(cm)
Treatments	Control	Br (1 mg/L)	Br (2 mg/L)	Br (3 mg/L)	JO (500 µL/L)	JO (1000 µL/L)	JO (1500 µL/L)
Season 2023	12.3667	13.0667	13.9667	14.5667	12.4333	12.7333	12.9
Season 2024	12.6667	14.6667	15.4667	15.7667	13.5333	14	13.9
	shoot diameter
Treatments	Control	Br (1 mg/L)	Br (2 mg/L)	Br (3 mg/L)	JO (500 µL/L)	JO (1000 µL/L)	JO (1500 µL/L)
Season 2023	1.12	1.16	1.23667	1.29333	1.19333	1.21667	1.25
Season 2024	1.17333	1.266	1.272	1.33333	1.25	1.28333	1.24667
	Weight of 100 berry per cluster (g)
Treatments	Control	Br (1 mg/L)	Br (2 mg/L)	Br (3 mg/L)	JO (500 µL/L)	JO (1000 µL/L)	JO (1500 µL/L)
Season 2023	205.667	231	242.333	261	211	219	223
Season 2024	207.697	233.28	244.725	263.576	213.083	221.162	225.201
	pruining weight
Treatments	Control	Br (1 mg/L)	Br (2 mg/L)	Br (3 mg/L)	JO (500 µL/L)	JO (1000 µL/L)	JO (1500 µL/L)
Season 2023	1.65	2.28667	2.28667	2.51333	1.95667	2.1	2.3
Season 2024	1.82	2.30667	2.45	2.65	2.13667	2.24667	2.19
	Berry diameter (mm)
Treatments	Control	Br (1 mg/L)	Br (2 mg/L)	Br (3 mg/L)	JO (500 µL/L)	JO (1000 µL/L)	JO (1500 µL/L)
Season 2023	14.3333	16.6667	17.6667	17.6667	15	15.3333	16
Season 2024	15.6667	18	18.6667	19	17	17	17.6667
	Berry lengthg
Treatments	Control	Br (1 mg/L)	Br (2 mg/L)	Br (3 mg/L)	JO (500 µL/L)	JO (1000 µL/L)	JO (1500 µL/L)
Season 2023	14.6667	18.3333	19	20.3333	15.6667	16.3333	17.3333
Season 2024	14.6667	17.6667	17.3333	17.6667	15.3333	15.6667	16.6667
	Berry firmness (N)
Treatments	Control	Br (1 mg/L)	Br (2 mg/L)	Br (3 mg/L)	JO (500 µL/L)	JO (1000 µL/L)	JO (1500 µL/L)
Season 2023	1.94565	3.498	3.61662	3.70818	2.49828	2.86125	3.24057
Season 2024	2.331	3.84225	3.94362	4.16271	2.95281	3.58392	3.72453
	Berry SSC (°Brix)
Treatments	Control	Br (1 mg/L)	Br (2 mg/L)	Br (3 mg/L)	JO (500 µL/L)	JO (1000 µL/L)	JO (1500 µL/L)
Season 2023	16.6	17.0667	17.3333	17.4667	17.9333	18.2667	18.7333
Season 2024	16.8667	17.3333	17.7333	17.9333	18.1333	18.4	18.8
	Berry TA
Treatments	Control	Br (1 mg/L)	Br (2 mg/L)	Br (3 mg/L)	JO (500 µL/L)	JO (1000 µL/L)	JO (1500 µL/L)
Season 2023	0.664667	0.639333	0.615333	0.594667	0.555333	0.527333	0.482667
Season 2024	0.636	0.580667	0.540667	0.488	0.597333	0.550667	0.49
	Berry SSC/TA ratio
Treatments	Control	Br (1 mg/L)	Br (2 mg/L)	Br (3 mg/L)	JO (500 µL/L)	JO (1000 µL/L)	JO (1500 µL/L)
Season 2023	25.016	26.6978	28.1753	29.3818	32.3075	34.6702	38.8224
Season 2024	26.533	29.9131	32.8037	36.99	30.456	33.4499	38.4318
	Total sugars (%)
Treatments	Control	Br (1 mg/L)	Br (2 mg/L)	Br (3 mg/L)	JO (500 µL/L)	JO (1000 µL/L)	JO (1500 µL/L)
Season 2023	13.662	14.04	14.364	14.526	14.688	14.904	15.228
Season 2024	13.9487	14.3347	14.6655	14.8309	14.9963	15.2168	15.5476
	Tota lanthocynins(mg/g fw)
Treatments	Control	Br (1 mg/L)	Br (2 mg/L)	Br (3 mg/L)	JO (500 µL/L)	JO (1000 µL/L)	JO (1500 µL/L)
Season 2023	29.8333	30.3067	30.8467	31.18	31.7867	32.4467	33.34
Season 2024	30.2067	30.98	31.79	32.12	32.61	33.2667	33.6867
	Total phenols (mg 100 g-1 FW)
Treatments	Control	Br (1 mg/L)	Br (2 mg/L)	Br (3 mg/L)	JO (500 µL/L)	JO (1000 µL/L)	JO (1500 µL/L)
Season 2023	40.84	42.4667	44.3133	44.3533	59.0067	60.7267	61.5267
Season 2024	41.24	42.88	44.7467	44.7867	59.5889	61.3267	61.9267
	Flavonoids (mg/100 fresh weight)
Treatments	Control	Br (1 mg/L)	Br (2 mg/L)	Br (3 mg/L)	JO (500 µL/L)	JO (1000 µL/L)	JO (1500 µL/L)
Season 2023	13.77	14.7427	14.87	16.7033	16.2793	16.9913	18.5133
Season 2024	13.2717	14.46	15.002	16.535	16.445	19.033	20.7381
	POX ( U min g-1 FW)
Treatments	Control	Br (1 mg/L)	Br (2 mg/L)	Br (3 mg/L)	JO (500 µL/L)	JO (1000 µL/L)	JO (1500 µL/L)
Season 2023	52.0417	53.37	54.005	54.57	58.3083	67.6667	67.8333
Season 2024	59.8717	60.99	62.27	63.0867	67.0533	77.8167	78.0083
	PAL ( U min g-1 FW)
Treatments	Control	Br (1 mg/L)	Br (2 mg/L)	Br (3 mg/L)	JO (500 µL/L)	JO (1000 µL/L)	JO (1500 µL/L)
Season 2023	50.0867	55.2667	60.6333	59.0733	66.6733	71.7667	81.27
Season 2024	51.58	56.2867	62.5133	60.82	68.7103	74.0033	83.6967
	PPO U min g-1 FW)
Treatments	Control	Br (1 mg/L)	Br (2 mg/L)	Br (3 mg/L)	JO (500 µL/L)	JO (1000 µL/L)	JO (1500 µL/L)
Season 2023	0.439333	0.448	0.463333	0.490667	0.486333	0.504	0.533
Season 2024	0.460667	0.47	0.485333	0.512	0.51	0.528667	0.559333
	CAT U min g-1 FW)
Treatments	Control	Br (1 mg/L)	Br (2 mg/L)	Br (3 mg/L)	JO (500 µL/L)	JO (1000 µL/L)	JO (1500 µL/L)
Season 2023	89.3	94.9	101.8	107.2	104.3	110.7	115.5
Season 2024	89.9	96.3	103	107.5	105.55	111.9	116.9

## Sheet: charts
												Shoot Length (cm)
												2.3094	e
												2.88675	c
												2.51661	b
												2.51188	a
												2	d
												1.1547	cd
												1.52753	c
												5.7735	e
												1.52753	c
												1.1547	b
												2.16333	a
												1.1547	d
												3.21455	cd
												1	c
												Leaf Surface area (cm2)
												1.44404	e
												1.9	b
												1.82875	b
												1.28444	a
												2.01329	d
												1.6	cd
												0.92376	c
												1.74955	f
												0.6059	c
												1.40735	b
												1.245	a
												2.6495	e
												2.8	ed
												1.03923	d
												Chlorophyll a content (mg g-1 fw)
												0.0297867	f
												0.0995	b
												0.101508	b
												0.0520085	a
												0.0687895	e
												0.0320637	d
												0.0906729	c
												0.0323418	c
												0.124409	a
												0.127062	a
												0.0872758	a
												0.0717754	b
												0.0698604	b
												0.0753443	b
												Chlorophyll b content (mg g-1 fw)
												0.016039	f
												0.0105	b
												0.070812	b
												0.0656969	a
												0.0370405	e
												0.0172651	d
												0.0811316	c
												0.0974359	d
												0.0669894	b
												0.0145717	ab
												0.0577764	a
												0.0877415	c
												0.0244306	b
												0.0285211	ab
												Total chlorophyll content (mg/g fw)
												0.0458258	f
												0.03	b
												0.20232	b
												0.187705	a
												0.10583	e
												0.0493288	d
												0.108045	c
												0.0783882	e
												0.191398	b
												0.0416333	ab
												0.136504	a
												0.0404145	d
												0.064291	c
												0.0950555	c
												Leaf content of N (%)
												0.0264575	e
												0.072111	bc
												0.0305505	b
												0.0472582	a
												0.060829	e
												0.0513553	d
												0.02	c
												0.04	e
												0.076205	bc
												0.0305505	b
												0.0832666	a
												0.052915	e
												0.0559023	d
												0.046188	c
												Leaf content of P (%)
												0.0057735	e
												0.01	bc
												0.0057735	b
												0.0108167	a
												0.0057735	de
												0.0057735	d
												0.0057735	c
												0.0057735	e
												0.0152753	b
												0.01	b
												0.00827525	a
												0.0057735	de
												0.0173205	cd
												0.0057735	c
												Leaf content of K (%)
												0.02	c
												0.02	b
												0.0456776	ab
												0.01	a
												0.0305505	c
												0.052915	b
												0.054291	a
												0.011547	e
												0.052915	bc
												0.02	ab
												0.0305505	a
												0.023094	e
												0.046188	d
												0.0416333	c
												Fe (ppm)
												1.28675	f
												3.91456	b
												4.28675	b
												4.40833	a
												1.88675	e
												1.88675	d
												1.88675	c
												1.88675	e
												3.63763	b
												3.2564	b
												3.63763	a
												2.27525	e
												2.07377	d
												2.60555	c
												Zinc (ppm)
												1.0147	f
												1.42598	b
												1.1954	b
												1.25816	a
												0.8698	e
												1	d
												1.27525	c
												1.1547	e
												2.11885	b
												1.2624	b
												1.05505	a
												2.58167	de
												2.0589	d
												1.52753	c
												Mn (ppm)
												1.92753	c
												1.2156	b
												4.58258	ab
												1	a
												3.16611	c
												4.72582	b
												4.85947	a
												1.57735	d
												2.2915	b
												3.256	ab
												3.05505	a
												2	d
												5.2915	c
												4.16333	b
												Mg content (mg/1000 g dw)
												1.52753	d
												2.51661	b
												5.1316	a
												1	a
												3.05505	c
												3.68624	b
												4.80686	a
												0.57735	e
												4.4291	bc
												2.51661	ab
												3.60555	a
												2.51661	e
												4.4291	d
												4.3589	c
												Ca (%)
												0.0057735	d
												0.0503322	b
												0.0458258	ab
												0.01	a
												0.0251661	c
												0.0472582	b
												0.0485947	a
												0.0152753	e
												0.052915	b
												0.02	ab
												0.05	a
												0.04	de
												0.052915	cd
												0.0404145	bc
												Internode length
												0.189306	e
												0.108167	c
												0.0730353	b
												0.0410151	a
												0.152753	de
												0.0553491	d
												0.0662328	d
												0.0792502	e
												0.1	c
												0.0503333	b
												0.104575	a
												0.0608276	d
												0.10773	c
												0.0950438	c
												Coefficient wood ripening
												0.0057735	e
												0	b
												0.0057735	ab
												0.0208167	a
												0.01	d
												0.0057735	cd
												0.0057735	c
												0.02	d
												0.0057735	ab
												0.0057735	ab
												0.01	a
												0.0057735	c
												0.01	c
												0.01	bc
												Total carbohydrates (%)
												0.139274	e
												0.370045	bc
												0.500716	b
												0.345881	a
												0.242267	d
												0.0844594	c
												0.37634	bc
												0.208697	d
												0.04	c
												0.408083	b
												0.303535	a
												0.38	cd
												0.072111	c
												0.2	c
												Number of leaves per shoot
												0.750555	e
												0.2	c
												0.034641	b
												0.518845	a
												0.173205	d
												0.321455	cd
												0.1	cd
												0.34641	e
												0.378594	bc
												0.416333	b
												0.436616	a
												0.3	de
												0.173205	cd
												0.208167	bc
												Yield/vine (kg)
												0.181248	f
												0.170454	c
												0.06	b
												0.1494	a
												0.192873	e
												0.150997	de
												0.21	cd
												0.069282	f
												0.242487	c
												0.270555	b
												0.191954	a
												0.330454	e
												0.158745	de
												0.17641	d
												Cluster weight (g)
												5.04161	f
												11.0151	c
												2	b
												8.97999	a
												6.4291	e
												5.03322	de
												7	cd
												2.3094	f
												8.0829	c
												9.0185	b
												7.06513	a
												6.01514	e
												5.2915	de
												7.54701	d
												Cluster length (cm)
												0.6	d
												0.57735	bc
												0.57735	ab
												0.57735	a
												0.784624	d
												1.18462	cd
												1	cd
												0.51316	f
												0.404145	c
												0.404145	b
												0.696966	a
												0.550757	e
												0.208167	de
												0.519615	cd
												cluster width(cm)
												0.393288	c
												0.305505	bc
												0.404145	ab
												0.503322	a
												0.11547	c
												0.057735	c
												0.2	c
												0.305505	c
												0.493288	ab
												0.378594	a
												0.404145	a
												0.251661	bc
												0.2	b
												0.52915	b
												shoot diameter
												0.01	d
												0.0264575	cd
												0.0304145	ab
												0.0304145	a
												0.011547	bc
												0.0057735	bc
												0.034641	ab
												0.0251661	c
												0.0163707	ab
												0.021166	ab
												0.0201329	a
												0.02	b
												0.011547	ab
												0.036188	bc
												Weight of 100 berry per cluster (g)
												3.16333	e
												3.95633	c
												3.1101	b
												4.7178	a
												3.5641	ed
												3	d
												4.4641	cd
												3.20442	f
												2.06523	c
												3.17041	b
												4.80384	a
												4.01974	df
												3.51974	d
												3.49829	d
												Weight of pruning wood (kg/vine)
												0.052915	d
												0.100167	b
												0.0057735	b
												0.140475	a
												0.0503322	c
												0.0754983	bc
												0.0888819	b
												0.0556776	d
												0.0503322	b
												0.0608276	b
												0.12	a
												0.0750555	c
												0.113725	bc
												0.04	b
												Berry diameter (mm)
												0.57735	c
												0.57735	ab
												0.57735	a
												0.57735	a
												1	bc
												0.57735	bc
												0.1	abc
												0.57735	c
												1	a
												0.57735	a
												0.1	a
												0.1	bc
												1	bc
												0.57735	ab
												berry length
												0.57735	f
												0.57735	bc
												0.58	b
												0.57735	a
												0.57735	ef
												0.57735	de
												0.57735	cd
												0.57735	c
												0.57735	ab
												0.57735	ab
												0.57735	a
												0.57735	bc
												0.57735	bc
												0.57735	ab
												Berry firmness (N)
												0.0212198	e
												0.0311422	a
												0.0101937	a
												0.0256535	a
												0.0203874	d
												0.0203874	c
												0.0117706	b
												0.14985	f
												0.0981	bc
												0.0736295	b
												0.0483916	a
												0.00566381	e
												0.0838167	d
												0.113276	cd
												Berry SSC (°Brix)
												0.14641	f
												0.11547	e
												0.11547	de
												0.11547	d
												0.11547	c
												0.23094	b
												0.11547	a
												0.13094	f
												0.23094	e
												0.11547	d
												0.11547	cd
												0.11547	c
												0.2	b
												0.2	a
												Berry TA %
												0.00857694	a
												0.00351188	b
												0.00472582	c
												0.00568624	c
												0.0064291	d
												0.00814453	e
												0.00416333	f
												0.0072111	a
												0.00537314	bc
												0.00321455	c
												0.013516	d
												0.010306	ab
												0.00960902	c
												0.0111355	d
												Berry SSC/TA ratio
												0.277128	c
												0.092376	c
												0.092376	c
												0.092376	ab
												0.092376	bc
												0.184752	bc
												0.092376	a
												0.401396	d
												1.08097	c
												0.598119	bc
												1.05773	a
												1.18122	bc
												1.03977	b
												1.03053	a
												Total sugars (%)
												0.0861487	f
												0.147061	e
												0.0935307	de
												0.0635307	d
												0.0530744	c
												0.0723	b
												0.11	a
												0.109873	f
												0.109873	e
												0.0954937	d
												0.0954937	cd
												0.0954937	c
												0.0753999	b
												0.1054	a
												Total anthocynins in berry skin (mg/g fw)
												0.19813	f
												0.0986577	ef
												0.318957	de
												0.138564	cd
												0.189033	bc
												0.313297	b
												0.192873	a
												0.148462	e
												0.109368	d
												0.0173205	c
												0.216333	bc
												0.324191	b
												0.210079	a
												0.122202	a
												Total phenols (mg 100 g-1 FW)
												0.404475	c
												0.560119	bc
												0.81715	b
												0.962278	b
												0.306159	a
												0.642599	a
												0.0757188	a
												0.404475	c
												0.571664	bc
												0.828573	b
												0.973559	b
												0.302423	a
												0.642599	a
												0.306159	a
												Flavonoids (mg 100 g-1 fw)
												0.71072	d
												0.495191	d
												0.0264575	cd
												0.509542	b
												0.451	bc
												0.446481	b
												0.543797	a
												0.503049	e
												0.474434	de
												0.0144222	cd
												0.72617	c
												0.450823	c
												0.500029	b
												0.630955	a
												POX ( U min g-1 FW)
												0.373299	c
												0.670705	bc
												0.691258	bc
												0.775225	bc
												1.1525	b
												0.630104	a
												0.814576	a
												0.435613	c
												0.920009	bc
												0.924279	bc
												0.895513	bc
												1.36785	b
												0.64962	a
												0.861763	a
												PAL( U min g-1 FW)
												1.12536	e
												0.825126	de
												0.600694	cd
												2.5235	cd
												1.32332	bc
												2.33041	b
												1.075	a
												1.16391	e
												1.00901	de
												0.636108	cd
												2.59081	cd
												1.31619	bc
												2.38408	b
												1.1025	a
												PPO U min g-1 FW)
												0.00351188	e
												0.00360555	de
												0.00321455	d
												0.00702377	bc
												0.0080829	c
												0.007	b
												0.011	a
												0.00404145	d
												0.00360555	cd
												0.00503322	c
												0.0111355	b
												0.008544	b
												0.00750555	b
												0.0115036	a
												CAT U min g-1 FW)
												0.754983	f
												1.3715	e
												1.21244	d
												0.754983	bc
												0.754983	cd
												1.06723	b
												1	a
												0.458258	f
												0.967232	e
												1.21244	d
												1.21133	c
												0.826136	cd
												1.07232	b
												1.05227	a

## Sheet: row data
Season 2023
	Treatments	Replicates	Shoot Length (cm)	Means	Leaf surface area (cm2)	Means	chlorphy a	Means	chlorphy b	Means	Total chlorophyll content (mg/g fw)	Means	N	Means	P	Means	K	Means	Fe (ppm)	Means	Zinc (ppm)	Means	Mn (ppm)	Means	Mg (ppm)	Means	Ca (%)	Means	internode length	Means	Coefficient wood ripening	Means	total carbohydrates	Means	number of leaf	Means	yield/vine	Means	Cluster Weight (g)	Means	Cluster Length (cm)	Means	cluster width	Means	shoot dimater	Means	Weight of 100 Berry (g)	Means	pruining weight
Control	1	1	147	149.667	126	126.667	4.9335	4.901	2.6565	2.639	7.59	7.54	1.42	1.41	0.16	0.156667	1.28	1.26	80	78.3333	35	34.3333	112	110.333	129	130.333	1.01	1.01667	7.66	7.57333	0.74	0.736667	19.84	18.8467	20.1	19.9	13.62	14.08	454	469.333	20	21	12.6	12.3667	1.13	1.12	201	205.667	1.70292
	1	2	151		124		4.875		2.625		7.5		1.43		0.15		1.24		75		33		109		130		1.02		7.62		0.74		17.08		19.5		14.04		468		21		12.7		1.12		207		1.65
	1	3	151		130		4.8945		2.6355		7.53		1.38		0.16		1.26		80		35		110		132		1.02		7.44		0.73		19.62		20.1		14.58		486		22		11.8		1.11		209		1.59708
brassinosteroids at 1 mg/L	2	1	166	167.667	149	150	6.084	6.084	3.276	3.276	9.36	9.36	2.11	2.19	0.26	0.27	1.42	1.44	130	135	57	59	124	126	148	150.667	1.2	1.24667	8.27	8.43667	0.86	0.86	21.7	21.9333	22.1	22.3667	16.02	16.24	534	541.333	24	24.3333	12.8	13.0667	1.14	1.16	231	231	2.38683
	2	2	166		150		6.0645		3.2655		9.33		2.21		0.27		1.44		135		59		126		151		1.3		8.67		0.86		21.74		22.8		16.08		536		24		13.4		1.15		231		2.28667
	2	3	171		151		6.1035		3.2865		9.39		2.25		0.28		1.46		140		61		128		153		1.24		8.37		0.86		22.36		22.2		16.62		554		25		13		1.19		231		2.1865
brassinosteroids at 2 mg/L	3	1	173	175.667	152	154.667	6.1815	6.26383	3.3285	3.37283	9.51	9.63667	2.25	2.27667	0.29	0.283333	1.48	1.53	145	141.667	63	62	130	134	156	160.333	1.27	1.31	8.94	8.88667	0.89	0.886667	21.58	22.7233	23	23.4667	16.92	16.98	564	566	26	25.6667	13.6	13.9667	1.2	1.23667	237	242.333	2.29244
	3	2	178		153		6.1945		3.3355		9.53		2.27		0.28		1.52		140		62		133		159		1.3		8.75		0.88		23.15		23.6		16.98		566		25		13.9		1.23		241		2.28667
	3	3	176		159		6.4155		3.4545		9.87		2.31		0.28		1.59		140		61		139		166		1.36		8.97		0.89		23.44		23.8		17.04		568		26		14.4		1.28		249		2.28089
brassinosteroids at 3 mg/L	4	1	181	184.333	157	161	6.5195	6.65167	3.5105	3.58167	10.03	10.2333	2.39	2.42667	0.32	0.336667	1.54	1.55	160	168.333	70	73.6667	135	136	162	163	1.32	1.33	9.08	9.18667	0.88	0.903333	24.22	24.5233	24.13	24.5433	17.1	17.94	570	598	28	27.6667	14.5	14.5667	1.25	1.29333	251	261	2.65381
	4	2	184		162		6.76		3.64		10.4		2.41		0.36		1.56		180		79		137		164		1.34		9.18		0.91		24.45		24.5		18.18		606		27		14.1		1.33		265		2.51333
	4	3	188		164		6.6755		3.5945		10.27		2.48		0.33		1.55		165		72		136		163		1.33		9.3		0.92		24.9		25		18.54		618		28		15.1		1.3		267		2.37286
with jasmine oil 500 µL/L	5	1	155	157	133	135.333	5.1025	5.1805	2.7475	2.7895	7.85	7.97	1.47	1.54333	0.18	0.183333	1.3	1.33333	90	91.6667	39	40	114	116.667	136	139.333	1.11	1.13667	7.8	7.96667	0.78	0.79	19.74	20.24	20.6	20.9	14.64	14.86	488	495.333	22	21.3667	12.3	12.4333	1.18	1.19333	209	211	2.007
	5	2	157		135		5.2065		2.8035		8.01		1.53		0.18		1.36		90		40		119		142		1.16		8		0.79		20.4		20.9		14.94		498		20		12.5		1.2		211		1.95667
	5	3	159		138		5.2325		2.8175		8.05		1.63		0.19		1.34		95		41		117		140		1.14		8.1		0.8		20.58		21.2		15		500		22.1		12.5		1.2		213		1.90633
with jasmine oil 1000 µL/L	6	1	163	162.333	138	140	5.4535	5.46867	2.9365	2.94467	8.39	8.41333	1.75	1.87	0.2	0.206667	1.38	1.44	100	103.333	44	45	121	126.333	145	151.333	1.18	1.23333	8.22	8.17333	0.81	0.813333	21.74	21.2533	21.4	21.6	15	15.16	500	505.333	23.1	22.3667	12.7	12.7333	1.22	1.21667	217	219	2.1755
	6	2	163		142		5.447		2.933		8.38		1.89		0.21		1.46		105		45		128		153		1.25		8		0.82		20.84		21.7		15.18		506		23		12.8		1.21		219		2.1
	6	3	161		140		5.5055		2.9645		8.47		1.97		0.21		1.48		105		46		130		156		1.27		8.3		0.81		21.18		21.7		15.3		510		21		12.7		1.22		221		2.0245
with jasmine oil 1500 µL/L	7	1	163	162.667	141	142.333	5.6745	5.77417	3.0555	3.10917	8.73	8.88333	2.09	2.07	0.25	0.246667	1.48	1.55333	125	123.333	54	53.6667	130	136.667	156	163.667	1.27	1.33667	8.43	8.27667	0.82	0.823333	22.4	21.85	21.7	21.6333	15.48	15.63	516	521	22	23	12.9	12.9	1.23	1.25	221	223	2.38888
	7	2	161		143		5.7005		3.0695		8.77		2.05		0.24		1.6		120		52		141		169		1.38		8.3		0.83		21.57		21.8		15.54		518		23		12.7		1.29		221		2.3
	7	3	164		143		5.9475		3.2025		9.15		2.07		0.25		1.58		125		55		139		166		1.36		8.1		0.82		21.58		21.4		15.87		529		24		13.1		1.23		227		2.21112
Season 2024
	Treatments	Replicates	Shoot Length (cm)	Means	Leaf surface area (cm2)	Means	chlorphy a	Means	chlorphy b	Means	total chlorphy	Means	N	Means	P	Means	K	Means	Fe (ppm)	Means	Zinc (ppm)	Means	Mn (ppm)	Means	Mg (ppm)	Means	Ca (%)	Means	internode length	Means	Coefficient wood ripening	Means	total carbohydrates	Means	number of leaf	Means	y/vine	Means	Cluster Weight (g)	Means	Cluster Length (cm)	Means	cluster width	Means	shoot dimater	Means	Weight of 100 Berry (g)	Means	pruining weight
Control	1	1	161	157.667	127.373	128.047	5.1675	5.3625	2.7825	2.8875	7.95	8.25	1.47	1.47	0.18	0.176667	1.22	1.21333	89	87.3333	41	40.3333	115	114.667	133	132.333	1.09	1.09333	8.77	8.14333	0.74	0.74	20.75	20.3767	20.1	20.9667	13.47	13.55	449	451.667	20.7	20.5667	12.6	12.6667	1.15	1.17333	202.984	207.697	1.77
	1	2	151		125.352		5.525		2.975		8.5		1.43		0.17		1.2		84		39		114		132		1.11		7.33		0.72		19.94		21.4		13.59		453		20		12.4		1.17		209.043		1.81
	1	3	161		131.417		5.395		2.905		8.3		1.51		0.18		1.22		89		41		115		132		1.08		8.33		0.76		20.44		21.4		13.59		453		21		13		1.2		211.063		1.88
brassinosteroids at 1 mg/L	2	1	174	175.667	150.624	151.635	6.2075	6.34617	3.3425	3.41717	9.55	9.76333	1.97	2.15	0.26	0.273333	1.48	1.52	128	134.667	59	62.3333	140	144	168	172.667	1.37	1.41	8.8	8.9	0.87	0.873333	22.16	22.2	23.2	23.4	15.69	15.95	523	531.667	24.1	24.5333	14.9	14.6667	1.27	1.266	233.28	233.28	2.26
	2	2	176		151.635		6.448		3.472		9.92		2.25		0.27		1.5		133		62		142		170		1.39		8.9		0.87		22.2		23.4		15.99		533		24.6		15		1.28		233.28		2.3
	2	3	177		152.646		6.383		3.437		9.82		2.23		0.29		1.58		143		66		150		180		1.47		9		0.88		22.24		23.6		16.17		539		24.9		14.1		1.248		233.28		2.36
brassinosteroids at 2 mg/L	3	1	179	178.333	153.657	156.353	6.461	6.48267	3.479	3.49067	9.94	9.97333	2.25	2.27667	0.27	0.28	1.56	1.58	133	138	62	64	148	150	177	179.667	1.45	1.47	9.33	9.18667	0.87	0.873333	22.66	23.6933	23.8	23.82	16.53	16.81	551	560.333	25.4	25.8333	15.2	15.4667	1.256	1.272	239.339	244.725	2.41
	3	2	177		154.668		6.474		3.486		9.96		2.27		0.28		1.58		138		64		150		180		1.47		9.13		0.87		24.68		23.8		16.83		561		25.9		15.3		1.264		243.379		2.42
	3	3	179		160.733		6.513		3.507		10.02		2.31		0.29		1.6		143		66		152		182		1.49		9.1		0.88		23.74		23.86		17.07		569		26.2		15.9		1.296		251.458		2.52
brassinosteroids at 3 mg/L	4	1	189	192.333	158.711	162.755	6.565	6.66033	3.535	3.58633	10.1	10.2467	2.39	2.41667	0.3	0.313333	1.62	1.65333	148	154.667	69	71.6667	153	156.333	183	187	1.6	1.55	9.6	9.8	0.89	0.9	24.86	25.1333	25.2	25.62	17.13	17.91	571	597	26.3	27.5333	15.7	15.7667	1.312	1.33333	253.477	263.576	2.53
	4	2	191		163.766		6.6755		3.5945		10.27		2.35		0.33		1.68		163		75		159		190		1.55		9.7		0.91		25.08		25.46		18.15		605		27.9		16.2		1.336		267.616		2.65
	4	3	197		165.788		6.7405		3.6295		10.37		2.51		0.31		1.66		153		71		157		188		1.5		10.1		0.9		25.46		26.2		18.45		615		28.4		15.4		1.352		269.635		2.77
with jasmine oil 500 µL/L	5	1	163	162.333	134.45	136.808	5.6485	5.45197	3.0415	3.20137	8.69	8.65333	1.53	1.59	0.18	0.186667	1.24	1.25333	89	90.6667	41	42.6667	119	119	142	142.333	1.1	1.14	8.44	8.51	0.82	0.826667	20.66	20.98	21.7	21.8	13.83	14.21	461	473.667	21.2	21.8333	13.3	13.5333	1.23	1.25	211.063	213.083	2.06
	5	2	163		136.471		5.3382		3.2718		8.61		1.61		0.19		1.24		91		45		117		140		1.14		8.54		0.83		20.88		21.7		14.37		479		22.1		13.5		1.25		213.083		2.14
	5	3	161		139.504		5.3692		3.2908		8.66		1.63		0.19		1.28		92		42		121		145		1.18		8.55		0.83		21.4		22		14.43		481		22.2		13.8		1.27		215.102		2.21
with jasmine oil 1000 µL/L	6	1	168	170.333	139.504	141.526	5.5366	5.58207	3.3934	3.42127	8.93	9.00333	1.69	1.74667	0.19	0.21	1.3	1.35333	94	104.333	43	48	123	129	147	154.333	1.2	1.26	8.72	8.80667	0.84	0.84	21.9	21.98	22.4	22.6333	14.49	14.67	483	489	22.3	22.5333	13.8	14	1.27	1.28333	219.142	221.162	2.28
	6	2	169		143.548		5.5986		3.4314		9.03		1.67		0.22		1.38		108		51		133		159		1.3		8.7		0.85		22		22.5		14.73		491		22.6		14.2		1.29		221.162		2.34
	6	3	174		141.526		5.611		3.439		9.05		1.88		0.22		1.38		111		50		131		157		1.28		9		0.83		22.04		23		14.79		493		22.7		14		1.29		223.181		2.12
with jasmine oil 1500 µL/L	7	1	173	172	142.537	143.885	5.6978	5.69573	3.4922	3.49093	9.19	9.18667	1.91	1.93667	0.23	0.233333	1.52	1.48667	113	114	52	53.3333	144	140.667	162	165	1.41	1.36667	9	8.90667	0.84	0.85	22.18	22.18	23.1	23.1	15.09	15.29	503	509.667	23.2	23.5	14.1	13.9	1.3	1.24667	223.181	225.201	2.15
	7	2	171		144.559		5.7412		3.5188		9.26		1.99		0.24		1.44		118		55		136		163		1.33		8.91		0.85		22.38		23.2		15.09		503		23.2		13.3		1.22		223.181		2.19
	7	3	172		144.559		5.6482		3.4618		9.11		1.91		0.23		1.5		111		53		142		170		1.36		8.81		0.86		21.98		23		15.69		523		24.1		14.3		1.22		229.24		2.23
[truncated: 29 more columns]
